# Supplementary material for: A Novel Strategy for the Synthesis of Amphiphilic and Thermoresponsive Poly(N-isopropylacrylamide)-b-Polystyrene Block Copolymers via ATRP
Source: PubMed Central journal article supplement (PMC6780390; doi:10.3390/polym11091484), 2019-09-11
Supplement: polymers-11-01484-s001.pdf [file polymers-11-01484-s001.pdf]

Supplementary Material

**Table S1.** The conditions under which the chain extensions of PNIPAM-Cl with styrene via ARGET ATRP were conducted; number-averaged molecular masses ( $M_n$ ) of copolymers and macroinitiator determined from SEC analyses; estimated number of styrene mers in copolymers' chains.

| Sample  | Time [h] | [I]/[M]/[CuCl <sub>2</sub> ]/[L]/[Sn(EH) <sub>2</sub> ]<br><sup>a</sup> | $M_n$               | $M_n$                          | Estimated number of mers <sup>c</sup> |
|---------|----------|-------------------------------------------------------------------------|---------------------|--------------------------------|---------------------------------------|
|         |          |                                                                         | PNIPA<br>$M^b$ [Da] | copolymer <sup>b</sup><br>[Da] |                                       |
| PNPSI   | 23       | 1 : 200 : 0.002 : 0.1 : 0.4                                             | 4100                | 4700                           | 6                                     |
| PNPSII  | 24       | 1 : 200 : 0.005 : 0.1 : 0.48                                            | 4100                | 4200                           | 1                                     |
| PNPSIII | 93       | 1 : 200 : 0.005 : 0.85 : 0.08                                           | 4100                | 4400                           | 3                                     |
| PNPSIV  | 79       | 1 : 200 : 0.03 : 0.08 : 0.15                                            | 3300                | 3900                           | 6                                     |
| PNPSV   | 54       | 1 : 200 : 0.3 : 0.3 : 0.3                                               | 3300                | 4100                           | 8                                     |
| PNPSVI  | 64       | 1 : 200 : 0.3 : 0.3 : 0.5                                               | 3900                | 4600                           | 7                                     |
| PNPSVII | 96       | 1 : 200 : 0.3 : 0.3 : 1.5                                               | 3500                | 3700                           | 2                                     |

<sup>a</sup> I = PNIPAM-Cl molecules terminated by chlorine (macroinitiator), M = styrene (monomer), L = Me<sub>6</sub>TREN (ligand); <sup>b</sup> from SEC in 1% (w/v) LiBr/DMF, <sup>c</sup> calculated as the difference between number-average molecular masses of copolymer and PNIPAM-Cl used in the chain extension.

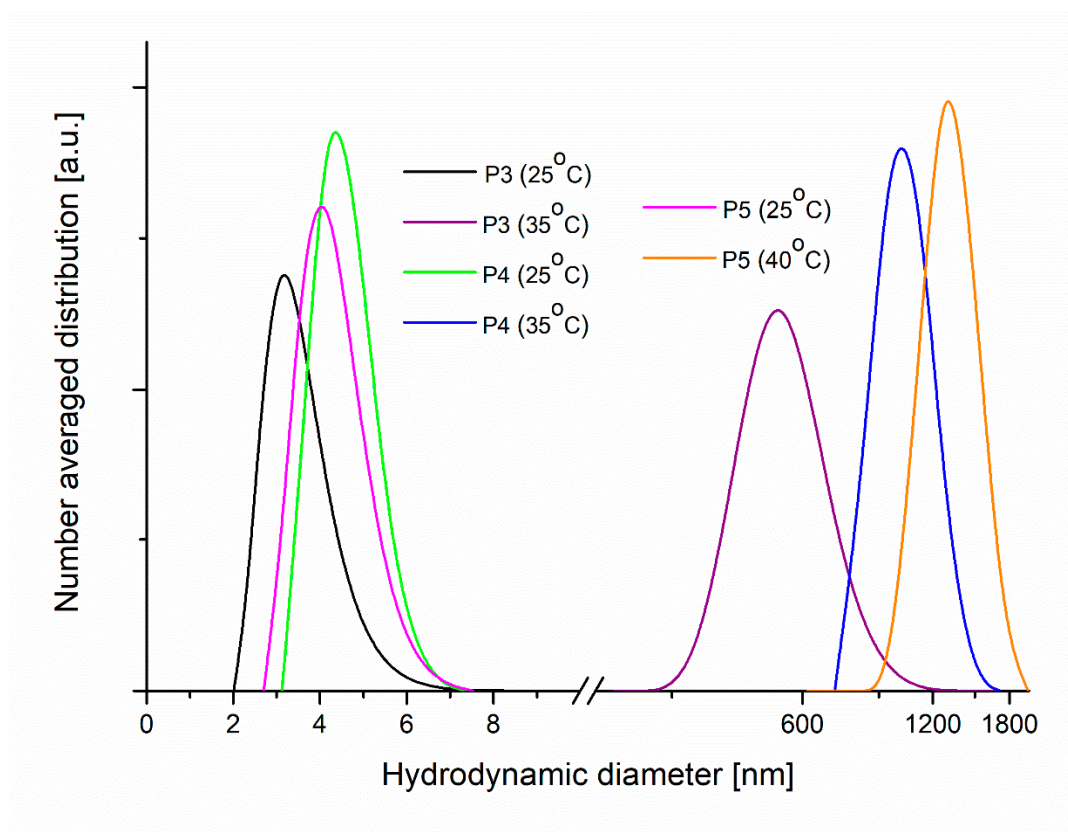

**Figure S1.** The number averaged hydrodynamic diameter distribution in aqueous solutions (1.5% w/w) of homopolymers (description of the samples in Table 1 in main document) at 25, 35 and 40 °C from DLS measurements. For P5 the changes in the size of particles at 35°C have not be observed in comparison with the sizes which observed at 25°C.

**Table S2.** Results of SEC analyses (with THF as eluent) for the prepared homopolymers before and after removal of terminal chlorine atoms as well as after esterification by using  $\alpha$ -bromoisobutyryl bromide.

| PNIPAM-Cl  |      | After Dehalogenation (PNIPAM-H) |      | After Esterification (PNIPAM-Br) |      |
|------------|------|---------------------------------|------|----------------------------------|------|
| $M_n$ [Da] | PDI  | $M_n$ [Da]                      | PDI  | $M_n$ [Da]                       | PDI  |
| 1500       | 1.53 | 2000                            | 1.48 | 2200                             | 1.49 |
| 3400       | 1.28 | 4000                            | 1.15 | 4000                             | 1.15 |
| 4100       | 1.41 | 5200                            | 1.34 | 5400                             | 1.30 |
| 5600       | 1.36 | 6100                            | 1.30 | 6000                             | 1.30 |

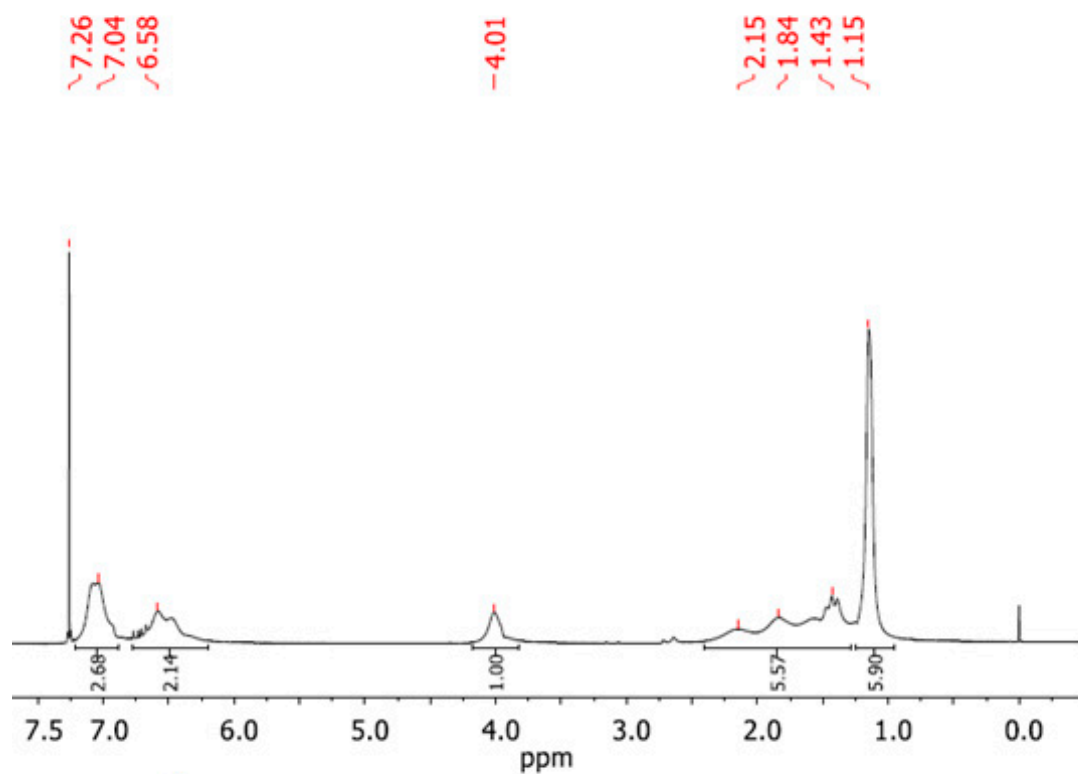

**Figure S2.** The 300 MHz  $^1\text{H}$  NMR spectrum of diblock copolymer PNIPAM-*b*-PS (recorded for the sample denoted as PNPS3 in Table 3) in  $\text{CDCl}_3$ .

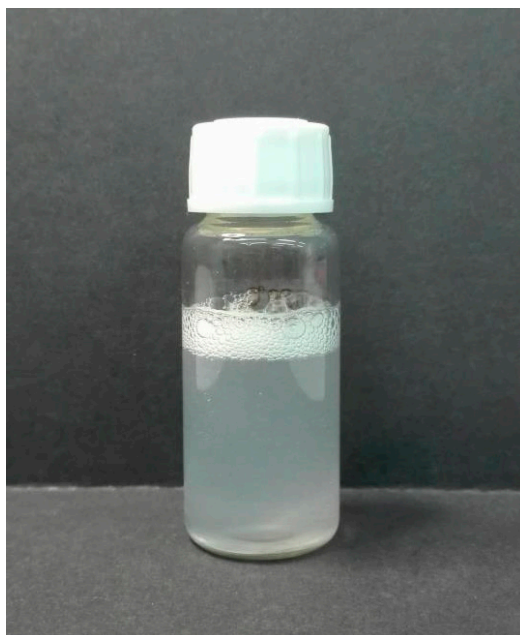

**Figure S3.** The photo of aqueous solution of the synthesized diblock copolymer PNIPAM-*b*-PS (a solution of sample PNPS3). As the molecule of PNPS3 is amphiphilic characteristic foam appears as a result of surface tension decreasing.

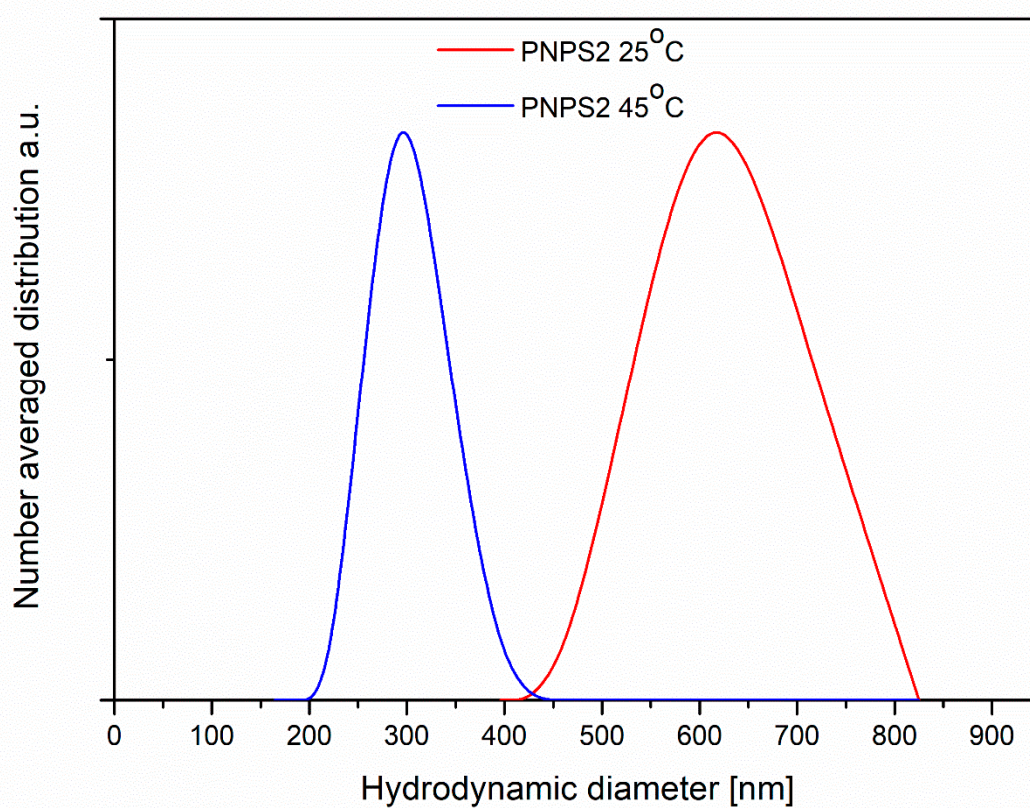

**Figure S4.** The number averaged hydrodynamic diameter distribution in aqueous solutions of PNPS2 at 25 and 45°C from DLS measurements.

**Table S3.** conditions under which of the chain extensions of PNIPAM-Br with styrene *via* ATRP were conducted; number-averaged molecular masses ( $M_n$ ) of copolymers and macroinitiator determined from SEC analyses.

| Sample      | Time [h] | Temp. [°C] | [I]/[M]/[CuBr]/[L] <sup>a</sup> | $M_n$ PNIPAM <sup>b</sup> [Da] | $M_n$ copolymer <sup>b</sup> [Da] |
|-------------|----------|------------|---------------------------------|--------------------------------|-----------------------------------|
| PNPS(200)21 | 21       | 90         | 1 : 200 : 2 : 2                 | 11753                          | 17950                             |

<sup>a</sup> I = PNIPAM-Br (macroinitiator), M = styrene (monomer), L = bpy (ligand); <sup>b</sup> from SEC in 1% (w/v) LiBr/DMF.

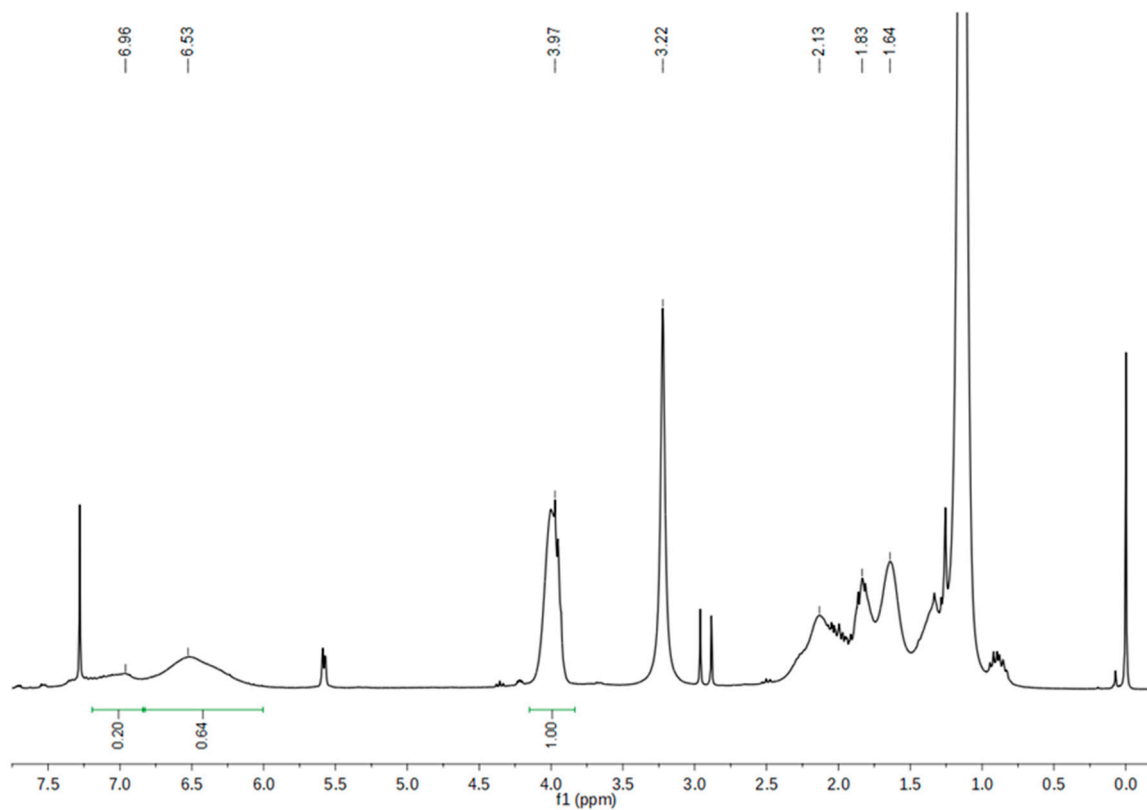

**Figure S5.** <sup>1</sup>H NMR spectrum of copolymer PNPS(200)21 synthesized via ATRP under conditions reported in Table S3.
